# Supplementary material for: Participation of the foreign public in the site selection procedure: prerequisites and the question of informal participation
Source: Copernicus journal article supplement (doi:10.5194/sand-1-225-2021), 2021-11-10
Supplement: Supplementary file 1 [file sand-1-225-2021-supplement.pdf]

Supplement of Saf. Nucl. Waste Disposal, 1, 225–226, 2021  
<https://doi.org/10.5194/sand-1-225-2021-supplement>  
© Author(s) 2021. CC BY 4.0 License.

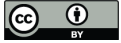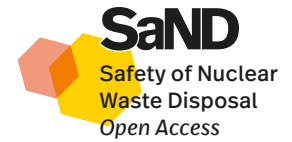

*Supplement of*

## **Participation of the foreign public in the site selection procedure: prerequisites and the question of informal participation**

**Silvia Schütte and Johannes Franke**

*Correspondence to:* Silvia Schütte (s.schuette@oeko.de)

The copyright of individual parts of the supplement might differ from the article licence.

# PARTICIPATION OF THE FOREIGN PUBLIC IN THE SITE SELECTION PROCEDURE

## Public participation in the site selection procedure and its application to the foreign public

- Rules on public participation are a cornerstone of the procedure established by the StandAG
- Comprehensively regulated in Chapter 2 of the statute (§§ 5-11 StandAG), inter alia:
  - » Formal participation process at every stage of the procedure (including EIA-participation): § 7 StandAG, UVPG
  - » „Regional Conferences“ for possible siting regions: § 10 StandAG
  - » Informal participation: § 5 (3) StandAG
- Provisions are tailored to domestic participation
  - » Transboundary relevance of nuclear waste disposal
  - » Legal requirement regarding participation of the foreign public?

## Formal participation process pursuant to § 7 StandAG and UVPG (EIA and SEA)

- Joint implementation of the participation procedures pursuant to § 7 StandAG and UVPG (EIA and SEA)
- Relationship of legal requirements pursuant to § 7 StandAG and UVPG respectively
  - » Both statutes provide rules regarding information, written submissions and consultations of the public
  - » “Most-favoured-participation-principle”: law with more extensive requirements prevails
- Application to foreign participation
  - » UVPG (EIA and SEA) provides specific rules for participation of the foreign public (e.g. translation, interpretation), but limited to countries where “significant environmental impact” can occur
  - » § 7 StandAG applies to the general international public, but does not establish specific rules for the foreign public
  - » Conclusion:
    - » Everyone can participate
    - » Specific rules for participation of the foreign public pursuant to UVPG are limited to certain countries (e.g. translation)

## Participation in the „Regional Conferences“ pursuant to § 10 StandAG

- Participation format for people living in or close to possible siting regions
- If siting region borders on another state, the interests of the foreign public concerned must be “considered equally” according to § 10 (2) StandAG – but how?
- Defining the relevant foreign region
  - » The equivalence could be taken into account by selecting a geographic section that corresponds in its maximum extent to the largest German territorial authority bordering the siting region
- General Assembly
  - » The foreign citizens are to participate in the General Assembly – on the same level as the citizens of the domestic territorial authorities (next to the siting region)
- Representative body
  - » In lack of a concrete regulation the equal consideration should also be reflected here. The rules must at least allow for the eligibility of foreign citizens

## Informal participation

- The principles of participation in § 5 StandAG show no difference between domestic and foreign public to be involved
- Informal participation is foreseen in § 5 (3) StandAG (so too: “further development” of participation)
- In case - siting region borders on another state – there is an obligation to involve the foreign public, this could also apply to the (regional) informal participation
- “spillover effect” on the participation of the foreign public
  - » Otherwise, an informational and participatory “gap” could arise

The research results presented are part of the BASE-commissioned research project “Challenges and success factors in cross-border public participation in the site selection procedure (HErüber)”

**Thank you!**

All presented concepts, ideas and texts are intellectual property of UfU e.V.

Any use of the content is prohibited and has to be requested and approved in a written format by the authors.

© Unabhängiges Institut für Umweltfragen, 22.10.20
